# Supplementary material for: Evaluation of SARS-CoV-2 identification methods through surveillance of companion animals in SARS-CoV-2-positive homes in North Carolina, March to December 2020
Source: PeerJ. 2023 Oct 24;11:e16310. doi: 10.7717/peerj.16310 (PMC10607186; doi:10.7717/peerj.16310)
Supplement: Supplemental Information 6 [file peerj-11-16310-s006.xlsx]

## Sheet: Results
Paper_household_ID	COVID_Household	Species	Timepoint	Sample_Type	Denny_run	VL_RNA_cp_per_mL	VL_Log10	Denny_result	COBAS_target1	COBAS_target2	COBAS_result	Control_real	IgG1_OD	IgG1_cutoff	IgG2_OD	IgG2_cutoff	IgG_result	IgM1_OD	IgM1_cutoff	IgM2_OD	IgM2_cutoff	IgM_result	VN_numerical	VN_result
1	Yes	Feline	0	Oral	Yes	Not Detected	Not Detected	Negative
1	Yes	Feline	3	Oral	Yes	Not Detected	Not Detected	Negative
1	Yes	Feline	7	Oral	Yes	Not Detected	Not Detected	Negative
1	Yes	Feline	28	Oral	Yes	Not Detected	Not Detected	Negative
1	Yes	Feline	60	Oral	Yes	Not Detected	Not Detected	Negative
1	Yes	Feline	60	Rectal	Yes	Not Detected	Not Detected	Negative
1	Yes	Feline	180	Serum								Exposed serum sample	0.161	0.1907	0.186	0.1153	Negative	0.476	0.544	0.445	0.501	NA	20.1	Positive
2	Yes	Canine	120	Serum								Exposed serum sample	0.461	0.79	0.316	0.525	Negative	0.471	0.47	0.52	0.532
2	Yes	Feline	120	Serum								Exposed serum sample	0.164	0.189	NA	NA	Negative	0.79	0.313	NA	NA	NA
3	Yes	Canine	0	Oral	Yes	Not Detected	Not Detected	Negative
3	Yes	Canine	120	Serum								Exposed serum sample	0.69	0.79	NA	NA	Negative	0.525	0.47	NA	NA	Negative
3	Yes	Feline	0	Oral	Yes	Not Detected	Not Detected	Negative
3	Yes	Feline	120	Serum								Exposed serum sample	0.147	0.189	0.15	0.1532	Negative	0.54	0.313	0.453	0.311	NA
3	Yes	Feline	0	Oral	Yes	Not Detected	Not Detected	Negative
3	Yes	Feline	120	Serum								Exposed serum sample	0.89	0.189	1.347	0.1532	Positive	0.406	0.544	0.399	0.311	NA
4	Yes	Canine	0	Oral	Yes	Not Detected	Not Detected	Negative
4	Yes	Canine	60	Oral	Yes	Not Detected	Not Detected	Negative
4	Yes	Canine	120	Serum								Exposed serum sample	0.444	0.72137	0.35	0.525	Negative	0.389	0.47	0.433	0.532	Negative
4	Yes	Feline	0	Oral	Yes	Not Detected	Not Detected	Negative
4	Yes	Feline	60	Oral	Yes	Not Detected	Not Detected	Negative
4	Yes	Feline	60	Rectal	Yes	Not Detected	Not Detected	Negative
4	Yes	Feline	120	Serum								Exposed serum sample	0.18	0.189	NA	NA	Negative	0.767	0.5956	NA	NA	NA
5	Yes	Feline	0	Oral	Yes	Not Detected	Not Detected	Negative
5	Yes	Feline	28	Oral	Yes	2399	3.38	Positive			Negative
5	Yes	Feline	28	Rectal	Yes	Not Detected	Not Detected	Negative
5	Yes	Canine	28	Oral	Yes	Not Detected	Not Detected	Negative
5	Yes	Canine	28	Rectal	Yes	Not Detected	Not Detected	Negative
5	Yes	Canine	0	Oral	Yes	Not Detected	Not Detected	Negative
5	Yes	Canine	28	Oral	Yes	Not Detected	Not Detected	Negative
5	Yes	Canine	28	Rectal	Yes	1170	3.07	Positive	34.3	36.55	Positive
6	Yes	Canine	7	Oral	Yes	Not Detected	Not Detected	Negative
6	Yes	Canine	120	Serum								Exposed serum sample	0.49	0.79	0.265	0.525	Negative	0.338	0.42	0.365	0.532	Negative
6	Yes	Canine	7	Oral	Yes	Not Detected	Not Detected	Negative
6	Yes	Canine	120	Serum								Exposed serum sample	0.426	0.79	0.434	0.722	Negative	0.392	0.42	0.387	0.488	Negative
7	Yes	Canine	7	Oral	Yes	Not Detected	Not Detected	Negative
7	Yes	Canine	21	Oral	Yes	Not Detected	Not Detected	Negative
7	Yes	Canine	21	Rectal	Yes	Not Detected	Not Detected	Negative
7	Yes	Canine	28	Oral	Yes	Not Detected	Not Detected	Negative
7	Yes	Canine	28	Rectal	Yes	Not Detected	Not Detected	Negative
7	Yes	Canine	120	Serum								Exposed serum sample	1.751	0.79	1.93	0.525	Positive	0.947	0.47	1.308	0.532	Positive	57.3	Positive
8	Yes	Canine	0	Oral	Yes	Not Detected	Not Detected	Negative
8	Yes	Canine	28	Oral	Yes	Not Detected	Not Detected	Negative
8	Yes	Canine	28	Rectal	Yes	Not Detected	Not Detected	Negative
8	Yes	Feline	0	Oral	Yes	Not Detected	Not Detected	Negative
8	Yes	Feline	7	Oral	Yes	Not Detected	Not Detected	Negative
8	Yes	Feline	14	Oral	Yes	Not Detected	Not Detected	Negative
8	Yes	Feline	21	Oral	Yes	Not Detected	Not Detected	Negative
8	Yes	Feline	21	Rectal	Yes	Not Detected	Not Detected	Negative
8	Yes	Feline	45	Oral	Yes	Not Detected	Not Detected	Negative
8	Yes	Feline	7	Oral	Yes	Not Detected	Not Detected	Negative
9	Yes	Canine	0	Oral	Yes	Not Detected	Not Detected	Negative
9	Yes	Canine	28	Oral	Yes	Not Detected	Not Detected	Negative
9	Yes	Canine	28	Rectal	Yes	Not Detected	Not Detected	Negative
9	Yes	Canine	120	Serum								Exposed serum sample	1.287	0.72137	1.126	0.7722	Positive	0.174	0.47	0.207	0.488	Negative	18	Negative
10	Yes	Canine	0	Oral	Yes	Not Detected	Not Detected	Negative
10	Yes	Canine	21	Oral	Yes	Not Detected	Not Detected	Negative
10	Yes	Canine	21	Rectal	Yes	Not Detected	Not Detected	Negative
10	Yes	Canine	120	Serum								Exposed serum sample	1.46	0.72137	1.158	0.525	Positive	0.315	0.47	0.412	0.532	Negative	21.8	Positive
10	Yes	Canine	0	Oral	Yes	Not Detected	Not Detected	Negative
10	Yes	Canine	21	Oral	Yes	Not Detected	Not Detected	Negative
10	Yes	Canine	21	Rectal	Yes	Not Detected	Not Detected	Negative
10	Yes	Canine	120	Serum								Exposed serum sample	0.424	0.79	0.346	0.7722	Negative	0.332	0.47	0.341	0.488	Negative
11	Yes	Feline	7	Oral	Yes	Not Detected	Not Detected	Negative
11	Yes	Feline	7	Rectal	Yes	Not Detected	Not Detected	Negative
11	Yes	Feline	28	Oral	Yes	Not Detected	Not Detected	Negative
11	Yes	Feline	28	Rectal	Yes	Not Detected	Not Detected	Negative
11	Yes	Feline	120	Serum								Exposed serum sample	0.187	0.1907	0.185	0.1532	Negative	0.473	0.544	0.437	0.311	NA
12	Yes	Canine	0	Oral	Yes	Not Detected	Not Detected	Negative
12	Yes	Canine	28	Oral	Yes	Not Detected	Not Detected	Negative
12	Yes	Canine	120	Serum								Exposed serum sample	0.368	0.79	0.317	0.7722	Negative	0.533	0.42	0.469	0.488	Negative
13	Yes	Canine	0	Oral	Yes	Not Detected	Not Detected	Negative
13	Yes	Canine	0	Rectal	Yes	Not Detected	Not Detected	Negative
13	Yes	Canine	120	Serum								Exposed serum sample	0.716	0.79	0.479	0.525	Negative	0.981	0.42	1.159	0.532	Positive	23	Positive
14	Yes	Canine	14	Oral	Yes	Not Detected	Not Detected	Negative
14	Yes	Canine	14	Rectal	Yes	Not Detected	Not Detected	Negative
14	Yes	Canine	28	Oral	Yes	Not Detected	Not Detected	Negative
14	Yes	Canine	28	Rectal	Yes	Not Detected	Not Detected	Negative
14	Yes	Canine	120	Serum								Exposed serum sample	1.86	0.79	1.831	0.7722	Positive	1.725	0.42	2.473	0.488	Positive	69.6	Positive
14	Yes	Canine	14	Oral	Yes	Not Detected	Not Detected	Negative
14	Yes	Canine	14	Rectal	Yes	Not Detected	Not Detected	Negative
14	Yes	Canine	28	Oral	Yes	Not Detected	Not Detected	Negative
14	Yes	Canine	28	Rectal	Yes	Not Detected	Not Detected	Negative
14	Yes	Canine	120	Serum								Exposed serum sample	0.616	0.79	1.758	0.7722	Outlier	0.388	0.42	2.284	0.488	Outlier	68.2	Outlier
14	Yes	Canine	14	Oral	Yes	Not Detected	Not Detected	Negative
14	Yes	Canine	14	Rectal	Yes	Not Detected	Not Detected	Negative
14	Yes	Canine	28	Oral	Yes	Not Detected	Not Detected	Negative
14	Yes	Canine	28	Rectal	Yes	Not Detected	Not Detected	Negative
14	Yes	Canine	120	Serum								Exposed serum sample	0.341	0.79	0.229	0.525	Negative	0.15	0.42	0.184	0.532	Negative
15	Yes	Canine	0	Oral	Yes	Not Detected	Not Detected	Negative
15	Yes	Canine	0	Rectal	Yes	Not Detected	Not Detected	Negative
15	Yes	Canine	28	Oral	Yes	Not Detected	Not Detected	Negative
15	Yes	Canine	28	Rectal	Yes	Not Detected	Not Detected	Negative
15	Yes	Canine	180	Serum								Exposed serum sample	1.437	0.844	1.771	0.7722	Positive	0.505	0.42	0.728	0.488	Negative
15	Yes	Canine	0	Oral	Yes	Not Detected	Not Detected	Negative
15	Yes	Canine	28	Oral	Yes	Not Detected	Not Detected	Negative
16	Yes	Canine	0	Oral	Yes	Not Detected	Not Detected	Negative
16	Yes	Canine	0	Rectal	Yes	Not Detected	Not Detected	Negative
16	Yes	Canine	28	Oral	Yes	Not Detected	Not Detected	Negative
16	Yes	Canine	28	Rectal	Yes	Not Detected	Not Detected	Negative
17	Yes	Canine	0	Oral	Yes	Not Detected	Not Detected	Negative
17	Yes	Canine	0	Rectal	Yes	Not Detected	Not Detected	Negative
17	Yes	Canine	0	Oral	Yes	Not Detected	Not Detected	Negative
17	Yes	Canine	0	Rectal	Yes	Not Detected	Not Detected	Negative
18	Yes	Canine	0	Oral	Yes	Not Detected	Not Detected	Negative
18	Yes	Canine	0	Rectal	Yes	Not Detected	Not Detected	Negative
19	Yes	Feline	0	Oral	Yes	Not Detected	Not Detected	Negative
19	Yes	Feline	0	Rectal	Yes	Not Detected	Not Detected	Negative
19	Yes	Feline	120	Serum								Exposed serum sample	0.363	0.189	0.475	0.1532	Negative	0.406	0.544	0.217	0.311	NA
19	Yes	Feline	0	Oral	Yes	Not Detected	Not Detected	Negative
19	Yes	Feline	0	Rectal	Yes	Not Detected	Not Detected	Negative
19	Yes	Feline	120	Serum								Exposed serum sample	0.11	0.189	0.084	0.1532	Negative	0.482	0.544	0.374	0.311	NA
19	Yes	Canine	0	Oral	Yes	Not Detected	Not Detected	Negative
19	Yes	Canine	0	Rectal	Yes	Not Detected	Not Detected	Negative
19	Yes	Canine	120	Serum								Exposed serum sample	0.513	0.79	0.301	0.525	Negative	0.489	0.47	0.581	0.532	Negative
20	Yes	Canine	7	Oral	Yes	Not Detected	Not Detected	Negative
20	Yes	Canine	7	Rectal	Yes	Not Detected	Not Detected	Negative
20	Yes	Canine	28	Oral	Yes	Not Detected	Not Detected	Negative
20	Yes	Canine	28	Rectal	Yes	Not Detected	Not Detected	Negative
20	Yes	Canine	28	Serum								Exposed serum sample	0.488	0.79	0.603	0.7722	Negative	0.521	0.42	1.162	0.488	Negative
21	Yes	Canine	0	Oral	Yes	Not Detected	Not Detected	Negative
21	Yes	Canine	0	Rectal	Yes	Not Detected	Not Detected	Negative
21	Yes	Canine	0	Oral	Yes	Not Detected	Not Detected	Negative
21	Yes	Canine	0	Rectal	Yes	Not Detected	Not Detected	Negative
22	Yes	Feline	0	Oral	Yes	3333	3.52	Positive	33.08	34.54	Positive
22	Yes	Feline	0	Rectal	Yes	75	1.88	Positive	33.3	35.1	Positive
22	Yes	Feline	60	Serum								Exposed serum sample	0.168	0.1907	0.131	0.1532	Negative	0.331	0.544	0.312	0.311	NA
22	Yes	Canine	0	Oral	Yes	592	2.77	Positive	34.5	35.75	Positive
22	Yes	Canine	0	Rectal	Yes	206	2.31	Positive	-	36.44	Positive
22	Yes	Canine	60	Serum								Exposed serum sample	0.33	0.844	0.741	0.7722	Negative	0.538	0.42	1.125	0.488	Negative
23	Yes	Canine	3	Oral	Yes	Not Detected	Not Detected	Negative
23	Yes	Canine	3	Rectal	Yes	Not Detected	Not Detected	Negative
23	Yes	Canine	28	Oral	Yes	Not Detected	Not Detected	Negative
23	Yes	Canine	28	Rectal	Yes	Not Detected	Not Detected	Negative
23	Yes	Canine	28	Serum								Exposed serum sample	1.465	0.79	1.509	0.525	Positive	1.218	0.42	1.531	0.532	Positive	49.7	Positive
24	Yes	Canine	0	Oral	Yes	Not Detected	Not Detected	Negative
24	Yes	Canine	28	Oral	Yes	Not Detected	Not Detected	Negative
24	Yes	Canine	28	Rectal	Yes	Not Detected	Not Detected	Negative
24	Yes	Canine	28	Serum								Exposed serum sample	0.543	0.844	0.769	0.7722	Negative	0.68	0.42	0.855	0.488	Negative
25	Yes	Feline	7	Oral	Yes	Not Detected	Not Detected	Negative
25	Yes	Feline	28	Oral	Yes	Not Detected	Not Detected	Negative
25	Yes	Feline	28	Serum								Exposed serum sample	1.629	0.1907	1.757	0.1153	Positive	0.835	0.544	1.385	0.501	NA	54.2	Positive
25	Yes	Feline	7	Oral	Yes	Not Detected	Not Detected	Negative
25	Yes	Feline	7	Oral	Yes	Not Detected	Not Detected	Negative
25	Yes	Feline	28	Oral	Yes	Not Detected	Not Detected	Negative
25	Yes	Feline	28	Serum								Exposed serum sample	0.221	0.1907	0.25	0.1532	Negative	0.329	0.544	0.334	0.311	NA
25	Yes	Feline	7	Oral	Yes	Not Detected	Not Detected	Negative
25	Yes	Feline	7	Oral	Yes	Not Detected	Not Detected	Negative
25	Yes	Feline	28	Oral	Yes	Not Detected	Not Detected	Negative
25	Yes	Feline	28	Rectal	Yes	Not Detected	Not Detected	Negative
25	Yes	Feline	28	Serum								Exposed serum sample	1.583	0.1907	1.71	0.1532	Positive	1.285	0.544	1.214	0.311	NA	96.5	Positive
25	Yes	Feline	7	Oral	Yes	Not Detected	Not Detected	Negative
25	Yes	Feline	28	Oral	Yes	Not Detected	Not Detected	Negative
25	Yes	Feline	28	Serum								Exposed serum sample	0.96	0.1907	NA	NA	Positive	0.494	0.544	NA	NA	NA
25	Yes	Feline	28	Oral	Yes	Not Detected	Not Detected	Negative
25	Yes	Feline	28	Serum								Exposed serum sample	0.4	0.1907	0.246	0.1532	Negative	0.857	0.544	0.857	0.311		19.7	Negative
26	Yes	Canine	1	Oral	Yes	Not Detected	Not Detected	Negative
27	Yes	Canine	0	Oral	Yes	Not Detected	Not Detected	Negative
27	Yes	Canine	28	Oral	Yes	Not Detected	Not Detected	Negative
27	Yes	Canine	28	Serum								Exposed serum sample	1.218	0.844	1.513	0.7722	Positive	1.478	0.42	1.928	0.488	Positive	94	Positive
28	Yes	Canine	0	Oral	Yes	Not Detected	Not Detected	Negative
28	Yes	Canine	28	Oral	Yes	Not Detected	Not Detected	Negative
28	Yes	Canine	28	Serum								Exposed serum sample	1.349	0.844	1.552	0.7722	Positive	1.282	0.42	1.677	0.488	Positive
29	Yes	Canine	0	Oral	Yes	Not Detected	Not Detected	Negative
29	Yes	Canine	0	Rectal	Yes	Not Detected	Not Detected	Negative
29	Yes	Canine	28	Oral	Yes	Not Detected	Not Detected	Negative
29	Yes	Canine	0	Oral	Yes	Not Detected	Not Detected	Negative
29	Yes	Canine	0	Rectal	Yes	Not Detected	Not Detected	Negative
29	Yes	Canine	28	Oral	Yes	Not Detected	Not Detected	Negative
29	Yes	Canine	28	Rectal	Yes	Not Detected	Not Detected	Negative
29	Yes	Canine	28	Serum								Exposed serum sample	0.495	0.844	0.493	0.525	Negative	0.49	0.42	0.499	0.532	Negative
29	Yes	Canine	0	Oral	Yes	Not Detected	Not Detected	Negative
29	Yes	Canine	0	Rectal	Yes	Not Detected	Not Detected	Negative
29	Yes	Canine	28	Oral	Yes	Not Detected	Not Detected	Negative
29	Yes	Canine	28	Rectal	Yes	Not Detected	Not Detected	Negative
29	Yes	Canine	28	Serum								Exposed serum sample	0.482	0.844	0.4	0.525	Negative	0.27	0.42	0.382	0.532	Negative
29	Yes	Canine	0	Oral	Yes	Not Detected	Not Detected	Negative
29	Yes	Canine	28	Oral	Yes	Not Detected	Not Detected	Negative
30	Yes	Canine	0	Oral	Yes	Not Detected	Not Detected	Negative
30	Yes	Canine	28	Oral	Yes	Not Detected	Not Detected	Negative
31	Yes	Canine	0	Oral	Yes	Not Detected	Not Detected	Negative
31	Yes	Canine	0	Rectal	Yes	Not Detected	Not Detected	Negative
31	Yes	Canine	0	Oral	Yes	Not Detected	Not Detected	Negative
31	Yes	Canine	0	Rectal	Yes	Not Detected	Not Detected	Negative
32	Yes	Canine	0	Oral	Yes	Not Detected	Not Detected	Negative
32	Yes	Canine	0	Rectal	Yes	Not Detected	Not Detected	Negative
32	Yes	Canine	28	Oral	Yes	Not Detected	Not Detected	Negative
32	Yes	Canine	28	Rectal	Yes	Not Detected	Not Detected	Negative
32	Yes	Canine	28	Serum								Exposed serum sample	1.612	0.844	1.769	0.525	Positive	0.911	0.42	1.161	0.532	Positive	50.1	Positive
32	Yes	Feline	0	Oral	Yes	Not Detected	Not Detected	Negative
32	Yes	Feline	28	Oral	Yes	Not Detected	Not Detected	Negative
32	Yes	Feline	28	Rectal	Yes	Not Detected	Not Detected	Negative
32	Yes	Feline	0	Oral	Yes	Not Detected	Not Detected	Negative
32	Yes	Feline	28	Oral	Yes	Not Detected	Not Detected	Negative
32	Yes	Feline	28	Rectal	Yes	Not Detected	Not Detected	Negative
32	Yes	Canine	28	Oral	Yes	24	1.38	Negative			Negative
32	Yes	Canine	28	Rectal	Yes	Not Detected	Not Detected	Negative
DSH	Control_swab	Feline	0	Oral	Yes	Not Detected	Not Detected	Negative
Vizsla	Control_swab	Canine	0	Oral	Yes	Not Detected	Not Detected	Negative
	Control_swab	Canine	0	Rectal	Yes	Not Detected	Not Detected	Negative
unk	Control_swab	Canine	0	Rectal	Yes	Not Detected	Not Detected	Negative
	Control_swab	Canine	0	Oral	Yes	Not Detected	Not Detected	Negative
unk	Control_swab	Feline	0	Oral	Yes	10	1	Negative
	Control_swab	Feline	0	Rectal	Yes	8	0.9	Negative
whippet	Control_swab	Canine	0	Rectal	Yes	Not Detected	Not Detected	Negative
	Control_swab	Canine	0	Oral	Yes	Not Detected	Not Detected	Negative
DSH	Control_swab	Feline	0	Oral	Yes	Not Detected	Not Detected	Negative
	Control_serum	Feline		Serum								Pre-2019 serological control			0.096	0.1153				0.26	0.501		7.4	Negative
	Control_serum	Feline		Serum								Pre-2019 serological control			0.151	0.1532				0.618	0.311
	Control_serum	Feline		Serum								Pre-2019 serological control			0.083	0.1532				0.296	0.311
	Control_serum	Feline		Serum								Pre-2019 serological control			0.086	0.1532				0.116	0.311
	Control_serum	Feline		Serum								Pre-2019 serological control			0.081	0.1532				0.188	0.311
	Control_serum	Feline		Serum								Pre-2019 serological control			0.089	0.1532				0.308	0.311
	Control_serum	Feline		Serum								Pre-2019 serological control			0.08	0.1532				0.483	0.311
	Control_serum	Feline		Serum								Pre-2019 serological control			0.132	0.1532				0.423	0.311
	Control_serum	Feline		Serum								Pre-2019 serological control			0.083	0.1532				0.211	0.311
	Control_serum	Feline		Serum								Pre-2019 serological control			0.192	0.1532				0.341	0.311
	Control_serum	Feline		Serum								Pre-2019 serological control			0.12	0.1532				0.138	0.311
	Control_serum	Feline		Serum								Pre-2019 serological control			0.104	0.1532				0.287	0.311
	Control_serum	Feline		Serum								Pre-2019 serological control			0.106	0.1532				0.217	0.311
	Control_serum	Feline		Serum								Pre-2019 serological control			0.404	0.1532				0.754	0.311
	Control_serum	Feline		Serum								Pre-2019 serological control			0.105	0.1532				0.774	0.311
	Control_serum	Feline		Serum								Pre-2019 serological control			0.232	0.1532				0.798	0.311
	Control_serum	Feline		Serum								Pre-2019 serological control			0.147	0.1153				0.452	0.501		22.8	Positive
	Control_serum	Feline		Serum								Pre-2019 serological control			1.209	0.1153				0.346	0.501		30.5	Positive
	Control_serum	Feline		Serum								Pre-2019 serological control			0.157	0.1153				0.242	0.501		17.8	Negative
	Control_serum	Canine		Serum								Pre-2019 serological control			0.19	0.525				0.336	0.532
	Control_serum	Canine		Serum								Pre-2019 serological control			0.542	0.525				0.642	0.532
	Control_serum	Canine		Serum								Pre-2019 serological control			0.378	0.525				0.462	0.532		19	Negative
	Control_serum	Canine		Serum								Pre-2019 serological control			0.938	0.525				0.977	0.532
	Control_serum	Canine		Serum								Pre-2019 serological control			0.326	0.525				0.475	0.532
	Control_serum	Canine		Serum								Pre-2019 serological control			0.284	0.525				0.335	0.532
	Control_serum	Canine		Serum								Pre-2019 serological control			0.395	0.525				0.593	0.532
	Control_serum	Canine		Serum								Pre-2019 serological control			0.409	0.525				0.266	0.532		24.5	Positive
	Control_serum	Canine		Serum								Pre-2019 serological control			0.268	0.525				NA	NA
	Control_serum	Canine		Serum								Pre-2019 serological control			0.503	0.7722				1.235	0.532
	Control_serum	Canine		Serum								Pre-2019 serological control			0.319	0.7722				0.639	0.488
	Control_serum	Canine		Serum								Pre-2019 serological control			0.286	0.7722				0.312	0.488
	Control_serum	Canine		Serum								Pre-2019 serological control			0.907	0.7722				1.364	0.488
	Control_serum	Canine		Serum								Pre-2019 serological control			0.279	0.7722				0.61	0.488
	Control_serum	Canine		Serum								Pre-2019 serological control			0.213	0.7722				0.168	0.488
	Control_serum	Canine		Serum								Pre-2019 serological control			0.209	0.7722				0.197	0.488
	Control_serum	Canine		Serum								Pre-2019 serological control			0.272	0.7722				0.279	0.488
	Control_serum	Canine		Serum								Pre-2019 serological control			0.658	0.7722				0.891	0.488
	Control_serum	Canine		Serum								Pre-2019 serological control			0.135	0.7722				0.049	0.488
	Control_serum	Canine		Serum								Pre-2019 serological control			0.523	0.7722				0.336	0.488
	Control_serum	Canine		Serum								Pre-2019 serological control			0.333	0.7722				0.257	0.488
	Control_serum	Canine		Serum								Pre-2019 serological control			0.265	0.525				0.28	0.532
	Control_serum	Canine		Serum								Pre-2019 serological control			0.451	0.525				0.447	0.532
	Control_serum	Canine		Serum								Pre-2019 serological control			0.19	0.525				0.306	0.532
