# Supplementary material for: Evaluation of SARS-CoV-2 identification methods through surveillance of companion animals in SARS-CoV-2-positive homes in North Carolina, March to December 2020
Source: PeerJ. 2023 Oct 24;11:e16310. doi: 10.7717/peerj.16310 (PMC10607186; doi:10.7717/peerj.16310)
Supplement: Supplemental Information 7 [file peerj-11-16310-s007.xlsx]

## Sheet: Sheet 1 - C__Users_tegin_Deskto
Paper_house_ID	hp_species	hp_breed	hp_sex	hp_neuter_yn_unk	hp_age	exposed_yn	hp_medical_hx	hp_medications	pet_own	pet_own_unit	area_class	contact_bed	contact_furn	contact_hands	contact_face	contact_body	eat_habit_humandish	contact_humandish	contact_wildanimals	excretehome_habits	bites_yn	scratch_yn	hp_sx_present	hp_sx_lethargy	hp_sx_anorexia	hp_sx_fever	hp_sx_nausea	hp_sx_diarrhea	hp_sx_sneezing	hp_sx_coughing	hp_sx_itchy_watery_eyes	hp_sx_runny_nose	hp_sx_gums	hp_sx_retching	hp_sx_breath	hp_sx_nm_eyelid	hp_sx_other	Denny_result	COBAS_result	IgG_result	IgM_result	Any_seropos	Virus_neutralization
1	2	Domestic short hair	1	1	11	2	0	0	11	2	2	1	1	1	1	0	1	0	1	1	1	1	0	0	0	0	0	0	0	0	0	0	0	0	0	0	0	Negative	NA	Negative	NA	Negative	Positive
2	1	Labradoodle	0	1	10	1	1	0	10	2	2	1	1	0	0	0	0	1	0	1	0	0	0	0	0	0	0	0	0	0	0	0	0	0	0	0	0	NA	NA	Negative	Negative	Negative	NA
2	2	Domestic short hair	1	1	3	0	0	0	2	2	2	0	1	1	1	0	0	0	1	1	0	1	0	0	0	0	0	0	0	0	0	0	0	0	0	0	0	NA	NA	Negative	NA	Negative	NA
3	1	Pitbull	1	1	2.5	2	0	0	3	2	2	1	0	1	1	1	1	1	0	0	0	1	0	0	0	0	0	0	0	0	0	0	0	0	0	0	0	Negative	NA	Negative	Negative	Negative	NA
3	2	Domestic short hair	0	1	9	2	0	0	8.5	2	2	1	1	0	0	0	1	0	0	1	0	0	0	0	0	0	0	0	0	0	0	0	0	0	0	0	0	Negative	NA	Negative	NA	Negative	NA
3	2	Domestic short hair	0	1	9	2	0	0	8.5	2	2	1	1	0	0	0	0	0	0	1	0	0	0	0	0	0	0	0	0	0	0	0	0	0	0	0	NA	Negative	NA	Positive	NA	Positive	NA
4	1	Border Collie	1	1	15	2	NA	NA	14	2	2	0	0	1	0	0	1	1	0	0	0	0	0	0	0	0	0	0	0	0	0	0	0	0	0	0	0	Negative	NA	Negative	Negative	Negative	NA
4	2	Domestic short hair	0	1	2	2	NA	NA	18	1	2	1	1	0	0	0	0	0	0	1	0	1	0	0	0	0	0	0	0	0	0	0	0	0	0	0	0	Negative	NA	Negative	NA	Negative	NA
5	2	Domestic short hair	0	1	12	1	1	0	13	2	2	1	1	0	0	0	0	0	0	1	1	0	0	0	0	0	0	0	0	0	0	0	0	0	0	0	0	Positive	Negative	NA	NA	NA	NA
5	1	Pug	0	1	2	1	1	0	3.5	2	2	1	1	1	1	1	1	1	0	0	0	0	1	0	1	0	0	0	0	1	0	0	0	0	0	0	0	Negative	NA	NA	NA	NA	NA
5	1	Pug	0	1	13	1	0	0	10	2	2	0	1	1	0	1	1	1	0	0	0	0	0	0	0	0	0	0	0	0	0	0	0	0	0	0	0	Positive	Positive	NA	NA	NA	NA
6	1	Mixed breed	1	1	1	1	NA	NA	19	1	2	0	0	1	1	1	0	1	0	0	0	1	0	0	0	0	0	0	0	0	0	0	0	0	0	0	0	Negative	NA	Negative	Negative	Negative	NA
6	1	Mixed breed	1	1	12	1	NA	NA	12	2	2	0	1	1	1	0	1	0	0	0	0	1	0	0	0	0	0	0	0	0	0	0	0	0	0	0	0	Negative	NA	Negative	Negative	Negative	NA
7	1	Mixed breed	0	1	12	1	NA	NA	13	2	2	1	1	0	0	1	0	0	0	0	0	1	1	0	0	0	0	0	0	0	1	0	0	0	0	0	0	Negative	NA	Positive	Positive	Positive	Positive
8	1	Mixed breed	0	1	5	2	NA	NA	NA	NA	NA	NA	NA	NA	NA	NA	NA	NA	NA	NA	NA	NA	0	0	0	0	0	0	0	0	0	0	0	0	0	0	0	Negative	NA	NA	NA	NA	NA
8	1	Mixed breed	0	1	4	1	NA	NA	NA	NA	NA	NA	NA	NA	NA	NA	NA	NA	NA	NA	NA	NA	0	0	0	0	0	0	0	0	0	0	0	0	0	0	0	Negative	NA	NA	NA	NA	NA
8	2	Domestic long hair	1	1	11	1	0	0	NA	NA	NA	NA	NA	NA	NA	NA	NA	NA	NA	NA	NA	NA	1	1	0	0	0	0	1	0	0	1	1	1	0	0	1	Negative	NA	NA	NA	NA	NA
8	2	Domestic short hair	0	1	2	1	NA	NA	NA	NA	NA	NA	NA	NA	NA	NA	NA	NA	NA	NA	NA	NA	0	0	0	0	0	0	0	0	0	0	0	0	0	0	0	Negative	NA	NA	NA	NA	NA
9	1	Mixed breed	0	1	15	1	NA	NA	8.5	2	2	1	1	0	0	1	1	0	0	0	0	0	0	0	0	0	0	0	0	0	0	0	0	0	0	0	0	Negative	NA	Positive	Negative	Positive	Negative
10	1	Mixed breed	0	1	5	1	1	NA	18	1	2	1	1	1	1	1	1	0	0	0	0	1	1	1	0	0	0	0	0	1	0	0	0	0	0	0	NA	Negative	NA	Positive	Negative	Positive	Positive
10	1	Mixed breed	1	1	11	1	1	NA	7.5	1	2	0	1	1	0	1	1	0	0	0	0	0	1	0	0	0	0	0	1	0	0	0	0	0	0	0	0	Negative	NA	Negative	Negative	Negative	NA
11	2	Domestic short hair	1	1	4	2	0	0	4	2	2	1	1	1	1	1	1	1	1	1	1	1	0	0	0	0	0	0	0	0	0	0	0	0	0	0	NA	Negative	NA	Negative	NA	Negative	NA
12	1	Labradoodle	0	1	11	1	0	0	10	2	2	1	1	1	1	1	0	1	0	0	0	0	0	0	0	0	0	0	0	0	0	0	0	0	0	0	0	Negative	NA	Negative	Negative	Negative	NA
13	1	Goldendoodle	0	1	0.83	2	0	0	10	1	2	0	0	1	0	1	0	0	0	0	0	0	0	0	0	0	0	0	0	0	0	0	0	0	0	0	0	Negative	NA	Negative	Positive	Positive	Positive
14	1	Mixed breed	0	1	9	1	1	1	10	2	2	1	1	1	0	1	1	0	1	0	0	0	0	0	0	0	0	0	0	0	0	0	0	0	0	0	0	Negative	NA	Positive	Positive	Positive	Positive
14	1	Mixed breed	1	1	9	1	1	1	10	2	2	1	1	1	0	1	1	0	0	0	NA	NA	0	0	0	0	0	0	0	0	0	0	0	0	0	0	0	Negative	NA	Outlier	Outlier	Outlier	Outlier
14	1	Mixed breed	0	1	13	1	1	1	14	2	2	1	1	1	0	1	1	0	0	1	0	0	0	0	0	0	0	0	0	0	0	0	0	0	0	0	0	Negative	NA	Negative	Negative	Negative	NA
15	1	Mixed breed	1	1	7	1	NA	NA	8	2	2	0	1	0	0	0	1	0	0	0	0	0	0	0	0	0	0	0	0	0	0	0	0	0	0	0	0	Negative	NA	Positive	Negative	Positive	NA
15	1	Mixed breed	1	1	1.5	1	NA	NA	2	2	2	0	1	0	0	0	1	1	0	0	0	1	0	0	0	0	0	0	0	0	0	0	0	0	0	0	0	Negative	NA	NA	NA	NA	NA
16	1	Newfoundland	0	1	NA	NA	NA	NA	NA	NA	NA	NA	NA	NA	NA	NA	NA	NA	NA	NA	NA	NA	0	0	0	0	0	0	0	0	0	0	0	0	0	0	0	Negative	NA	NA	NA	NA	NA
17	1	Pug	1	1	1.5	1	NA	NA	NA	NA	NA	NA	NA	NA	NA	NA	NA	NA	NA	NA	NA	NA	0	0	0	0	0	0	0	0	0	0	0	0	0	0	0	Negative	NA	NA	NA	NA	NA
17	1	German Shepherd	1	1	0.4	1	NA	NA	NA	NA	NA	NA	NA	NA	NA	NA	NA	NA	NA	NA	NA	NA	0	0	0	0	0	0	0	0	0	0	0	0	0	0	0	Negative	NA	NA	NA	NA	NA
18	1	Mixed breed	1	1	8	1	1	NA	NA	NA	NA	NA	NA	NA	NA	NA	NA	NA	NA	NA	NA	NA	0	NA	NA	NA	NA	NA	NA	NA	NA	NA	NA	NA	NA	NA	NA	Negative	NA	NA	NA	NA	NA
19	2	Domestic short hair	1	1	2	1	0	0	3	2	2	1	1	1	0	0	1	0	0	1	1	1	0	0	0	0	0	0	0	0	0	0	0	0	0	0	0	Negative	NA	Negative	NA	Negative	NA
19	2	Domestic short hair	1	1	12	1	0	0	12	2	2	1	1	1	1	0	1	0	0	1	0	1	0	0	0	0	0	0	0	0	0	0	0	0	0	0	0	Negative	NA	Negative	NA	Negative	NA
19	1	German short haired pointer	0	1	1	1	0	0	1	2	2	1	1	1	1	1	0	1	0	1	0	1	0	0	0	0	0	0	0	0	0	0	0	0	0	0	0	Negative	NA	Negative	Negative	Negative	NA
20	1	Mixed breed	0	1	0.5	1	0	NA	6	1	2	0	1	1	1	1	0	0	0	1	0	1	0	0	0	0	0	0	0	0	0	0	0	0	0	0	0	Negative	NA	Negative	Negative	Negative	NA
21	1	Mixed breed	1	1	8	1	1	0	8	2	2	0	1	1	1	0	0	1	0	0	0	1	0	0	0	0	0	0	0	0	0	0	0	0	0	0	0	Negative	NA	NA	NA	NA	NA
21	1	Mixed breed	1	1	9	1	1	1	9	2	2	0	1	1	1	1	0	0	0	1	0	0	0	0	0	0	0	0	0	0	0	0	0	0	0	0	0	Negative	NA	NA	NA	NA	NA
22	2	Domestic short hair	0	1	4	1	0	0	NA	NA	NA	NA	NA	NA	NA	NA	NA	NA	NA	NA	NA	NA	0	0	0	0	0	0	0	0	0	0	0	0	0	0	0	Positive	Positive	Negative	NA	Negative	NA
22	1	Siberian husky	1	0	0.25	1	0	0	NA	NA	NA	NA	NA	NA	NA	NA	NA	NA	NA	NA	NA	NA	0	0	0	0	0	0	0	0	0	0	0	0	0	0	0	Positive	Positive	Negative	Negative	Negative	NA
23	1	Goldendoodle	1	0	0.5	1	0	1	4	1	2	1	1	1	1	1	1	1	0	1	0	1	1	0	0	0	0	0	0	0	0	1	0	0	0	0	0	Negative	NA	Positive	Positive	Positive	Positive
24	1	Poodle miniature	1	1	11	1	0	0	11	2	2	1	1	0	0	0	0	0	0	1	0	0	0	0	0	0	0	0	0	0	0	0	0	0	0	0	0	Negative	NA	Negative	Negative	Negative	NA
25	2	Domestic short hair	0	1	9	2	1	1	9	2	3	0	1	1	0	0	1	0	0	1	0	1	0	0	0	0	0	0	0	0	0	0	0	0	0	0	0	Negative	NA	Positive	NA	Positive	Positive
25	2	Domestic short hair	0	1	9	2	0	0	9	2	3	0	1	0	0	0	0	0	0	1	0	0	0	0	0	0	0	0	0	0	0	0	0	0	0	0	0	Negative	NA	NA	NA	NA	NA
25	2	Domestic short hair	0	1	9	2	NA	0	9	2	3	0	1	0	0	0	0	0	0	1	0	1	0	0	0	0	0	0	0	0	0	0	0	0	0	0	0	Negative	NA	Negative	NA	Negative	NA
25	2	Domestic short hair	1	1	3	2	1	0	3	2	3	0	1	0	0	0	0	0	0	1	0	1	0	NA	NA	NA	NA	NA	NA	NA	NA	NA	NA	NA	NA	NA	NA	Negative	NA	NA	NA	NA	NA
25	2	Domestic short hair	1	1	3	2	0	0	3	2	3	0	1	1	0	0	0	0	0	1	0	1	0	0	0	0	0	0	0	0	0	0	0	0	0	0	0	Negative	NA	Positive	NA	Positive	Positive
25	2	Domestic short hair	1	1	3	2	0	0	3	2	3	0	1	1	0	0	0	0	0	1	0	1	0	0	0	0	0	0	0	0	0	0	0	0	0	0	0	Negative	NA	Positive	NA	Positive	NA
25	2	Domestic short hair	1	1	3	2	0	0	3	2	3	0	1	0	0	0	0	0	0	1	0	1	0	0	0	0	0	0	0	0	0	0	0	0	0	0	0	Negative	NA	Negative	NA	Negative	Negative
26	1	Labradoodle	0	1	11.5	1	NA	NA	10.5	2	2	1	1	1	1	1	0	1	0	0	1	0	0	0	0	0	0	0	0	0	0	0	0	0	0	0	0	Negative	NA	NA	NA	NA	NA
27	1	Mixed breed	0	1	2	1	0	0	2	2	1	1	1	1	1	1	0	0	0	1	1	1	0	0	0	0	0	0	0	0	0	0	0	0	0	0	0	Negative	NA	Positive	Positive	Positive	Positive
28	1	Pomeranian	0	1	6	1	0	0	3	2	1	1	1	1	1	1	1	0	0	1	1	0	0	0	0	0	0	0	0	0	0	0	0	0	0	0	0	Negative	NA	Positive	Positive	Positive	NA
29	1	Mixed breed	1	1	13	1	1	0	8	2	2	0	0	1	1	0	1	1	0	1	0	0	1	0	0	0	0	0	1	0	0	0	0	0	0	0	0	Negative	NA	NA	NA	NA	NA
29	1	Mixed breed	1	1	4	1	1	1	3	NA	2	0	0	1	1	0	1	1	1	0	0	0	1	1	0	0	0	0	0	0	0	0	0	0	0	0	0	Negative	NA	Negative	Negative	Negative	NA
29	1	Mixed breed	0	1	6	1	1	0	5	NA	2	0	0	1	0	0	1	1	0	0	0	0	0	0	0	0	0	0	0	0	0	0	0	0	0	0	0	Negative	NA	Negative	Negative	Negative	NA
29	1	Mixed breed	0	1	9	1	1	0	3	NA	2	0	0	1	0	0	1	1	0	0	0	0	0	0	0	0	0	0	0	0	0	0	0	0	0	0	0	Negative	NA	NA	NA	NA	NA
30	1	Poodle miniature	1	1	NA	1	NA	NA	NA	NA	1	1	1	1	1	1	1	1	0	1	0	0	0	0	0	0	0	0	0	0	0	0	0	0	0	0	0	Negative	NA	NA	NA	NA	NA
31	1	Mixed breed	1	1	1.5	1	1	NA	13	1	2	1	1	1	1	0	1	1	0	0	1	1	0	0	0	0	0	0	0	0	0	0	0	0	0	0	0	Negative	NA	NA	NA	NA	NA
31	1	Mixed breed	1	1	6	1	NA	NA	6.5	2	2	1	1	1	1	1	1	0	0	0	1	1	0	0	0	0	0	0	0	0	0	0	0	0	0	0	0	Negative	NA	NA	NA	NA	NA
32	1	Goldendoodle	0	1	2	1	0	0	2	2	2	1	1	1	1	1	0	0	0	0	0	1	0	0	0	0	0	0	0	0	0	0	0	0	0	0	0	Negative	NA	Positive	Positive	Positive	Positive
32	2	Domestic short hair	0	1	3	1	0	0	2	2	2	1	1	1	0	1	0	0	1	1	0	0	0	0	0	0	0	0	0	0	0	0	0	0	0	0	0	Negative	NA	NA	NA	NA	NA
32	2	Domestic long hair	0	1	12	1	1	0	10	2	2	1	1	0	0	0	0	0	0	1	0	1	0	0	0	0	0	0	0	0	0	0	0	0	0	0	0	Negative	NA	NA	NA	NA	NA
32	1	Wheaten Terrier	1	1	3	1	NA	0	2.5	2	2	1	1	1	1	0	0	0	0	1	1	0	0	0	0	0	0	0	0	0	0	0	0	0	0	0	0	Negative	Negative	NA	NA	NA	NA
